# Supplementary material
Source: PubMed Central journal article supplement (PMC8103312)
Supplement: mmc1.pdf [file mmc1.pdf]

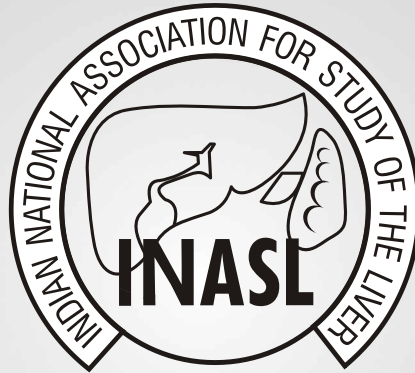

# **INDILI Proforma**

**(Indian Network for DILI)**

(DILI: Drug Induced Liver Injury)

Centre Serial No.

Dear Colleagues,

The **INASL (Indian National Association for Study of the Liver)** in 2012 has decided to collect data on drug-induced liver injury (INDILI). The objectives were to study the different types of drugs causing DILI, including their pattern and outcome. This initial effort will provide us with a framework to plan and pursue further studies.

Towards this end the **INDILI** has been tasked by the INASL to coordinate efforts to capture as much data on DILI as possible. Your participation is important and on behalf of the INASL, I invite you to be part of this venture. The data you will provide will bridge the existing gap regarding pan-India cause for DILI. Your data will be acknowledged and the analysis will be mailed to those who contribute in significant numbers i.e., 20 or more complete cases. Contributing physicians may need to procure consent from patients or from the institutional review boards.

The proforma may be downloaded from the INASL website ([www.inasl.org.in](http://www.inasl.org.in)) and copies made as required. Alternatively, if necessary, forms will be mailed on request.

**Instructions for filling the proforma:**

- Enter as much data as possible.
- DILI is a disease of exclusion, and hence acute viral hepatitis needs to be excluded before a diagnosis of DILI is made.
- The RUCAM page need not be filled and will be completed at the time of analysis

On behalf of the INASL, we look forward to receiving your wholehearted participation and contribution, which is essential for the success of this endeavour.

**Harshad Devarbhavi**

Chair - INDILI

**S P Singh**

Secretary General, INASL

**V A Saraswat**

President, INASL

## Drug Induced Liver Injury: Definition

AST or ALT > 5 times upper limit of normal (regardless of symptoms),

**OR**

Total bilirubin > 2 mg/dL and any rise in AST or ALT or alkaline phosphatase > 2 times upper limit of normal,

**OR**

AST or ALT > 3 times upper limit of normal, if symptomatic with nausea, vomiting, abdominal pain, anorexia, skin rashes etc.

**And**

Exclude competing causes such as viral hepatitis, bile duct obstruction or congestive heart failure.

INDILI Centre: \_\_\_\_\_

Name or initials: \_\_\_\_\_ Age: \_\_\_\_\_ Sex: \_\_\_\_\_

Hospital: \_\_\_\_\_

Hospital Landline no.: \_\_\_\_\_ Mobile no.: \_\_\_\_\_

Relative's mobile no.: \_\_\_\_\_

Seen in OPD: Yes  No  Admission Day    Discharge Day

Height \_\_\_\_\_ Weight \_\_\_\_\_ BMI \_\_\_\_\_

| Presentation                             | Duration |
|------------------------------------------|----------|
| Jaundice                                 |          |
| Nausea                                   |          |
| Vomiting                                 |          |
| Anorexia                                 |          |
| Itching                                  |          |
| Fever                                    |          |
| Skin rashes                              |          |
| Dark urine                               |          |
| Abdominal pain                           |          |
| Encephalopathy (Grade I / II / III / IV) |          |
| Seizures                                 |          |
| Renal failure                            |          |
| Skin rashes (Y/N) SJS (Y/N)              |          |
| Lymphadenopathy                          |          |
| Encephalopathy                           |          |
| JE (Jaundice-Encep) interval             |          |
| Hepatomegaly                             |          |
| Ascites                                  |          |
| Alcohol intake (g/d), duration           |          |
| Smoking, (Y/N) No. of days/year          |          |
| Hypoglycemia                             |          |

Implicated Drug: \_\_\_\_\_ Start Date \_\_\_\_\_ Stop Date \_\_\_\_\_ Duration \_\_\_\_\_ Dose \_\_\_\_\_

Concomitant Drug(s): \_\_\_\_\_ Start Date \_\_\_\_\_ Stop Date \_\_\_\_\_ Duration \_\_\_\_\_ Dose \_\_\_\_\_

Is underlying liver disease present: Yes  No  If yes: Active  Inactive

CAM (Complementary and Alternative Medicine) Ayurvedic/Siddha/Herbals/Homeopathy/Indigenous  
Name if possible: Duration \_\_\_\_\_ Dose \_\_\_\_\_

Primary Disease for which drug was given: \_\_\_\_\_

Were drugs discontinued with onset of symptoms: Yes  No

\*SJS: Stevens-Johnson syndrome

Is primary disease convincingly proven (eg. TB) or was treatment empirical

TB site: Pulmonary/ Lymph node/ Abdominal/ CNS/Bone

Associated Diseases eg. DM, HTN, CRF, HIV, others(specify)

| LFT / Others Variables                   | Lab Normal Range<br>(Upper limit of normal) | Baseline | Initial | Follow up tests | Follow up tests | Follow up tests |
|------------------------------------------|---------------------------------------------|----------|---------|-----------------|-----------------|-----------------|
| Dates                                    |                                             |          |         |                 |                 |                 |
| T. Proteins                              |                                             |          |         |                 |                 |                 |
| Albumin                                  |                                             |          |         |                 |                 |                 |
| T. Bilirubin                             |                                             |          |         |                 |                 |                 |
| D. Bilirubin                             |                                             |          |         |                 |                 |                 |
| AST                                      |                                             |          |         |                 |                 |                 |
| ALT                                      |                                             |          |         |                 |                 |                 |
| ALP                                      |                                             |          |         |                 |                 |                 |
| GGT                                      |                                             |          |         |                 |                 |                 |
| PT / INR                                 |                                             |          |         |                 |                 |                 |
| S. Creatinine                            |                                             |          |         |                 |                 |                 |
| FBS / RBS                                |                                             |          |         |                 |                 |                 |
| HB                                       |                                             |          |         |                 |                 |                 |
| WBC (Total Count)                        |                                             |          |         |                 |                 |                 |
| Neutrophil/Lymphocyte/<br>Eosinophil (%) |                                             |          |         |                 |                 |                 |
| Platelet                                 |                                             |          |         |                 |                 |                 |
| HBsAg/ IgManti-HBc                       |                                             |          |         |                 |                 |                 |
| IgM Anti-HEV                             |                                             |          |         |                 |                 |                 |
| IgM Anti-HAV                             |                                             |          |         |                 |                 |                 |
| HCV                                      |                                             |          |         |                 |                 |                 |
| ANA/SMA                                  |                                             |          |         |                 |                 |                 |
| HIV                                      |                                             |          |         |                 |                 |                 |
| CD 4 Count                               |                                             |          |         |                 |                 |                 |

USG (abdomen) \_\_\_\_\_

FHF: Yes  No

Recovery: Yes  No

Treatment given: Steroids  UDCA  SAME  Others (name) \_\_\_\_\_

Sepsis: Yes  No  Site: Chest/ urine/blood/abdomen

Management: Antibiotics/ Inotropic support/ Ventilation/ Others (Mention)

Cause of death: ALF  ACLF  CLD  Sepsis  Others: \_\_\_\_\_

Liver biopsy (if done) Antemortem  Post mortem

Case narrative/brief description of case when possible \_\_\_\_\_

Date: \_\_\_\_\_

Name of Investigator \_\_\_\_\_ Signature \_\_\_\_\_

\*ULN - upper limit of normal values to be mentioned for baseline LFT variables

# RUCAM (Roussel Uclaf Causality Assessment Method) J Clinical Epidemiology 1993;46:1323-30

|                                                                                                                                                                                                                                                                                              | Score  |
|----------------------------------------------------------------------------------------------------------------------------------------------------------------------------------------------------------------------------------------------------------------------------------------------|--------|
| <b>1. Temporal relationship of start of drug to start of illness</b>                                                                                                                                                                                                                         |        |
| a. Initial treatment 5-90 days; subsequent treatment course: 1-15 days                                                                                                                                                                                                                       | +2     |
| b. Initial treatment <5 or >90 days; subsequent treatment course: >15 days                                                                                                                                                                                                                   | +1     |
| c. From cessation of drug: within 15 days; or within 15 days after subsequent treatment                                                                                                                                                                                                      | +1     |
| d. Otherwise                                                                                                                                                                                                                                                                                 | 0      |
| <b>2. Course</b>                                                                                                                                                                                                                                                                             |        |
| a. ALT decreases $\geq 50\%$ from peak within 8 days                                                                                                                                                                                                                                         | +3     |
| b. ALT decreases $\geq 50\%$ from peak within 30 days                                                                                                                                                                                                                                        | +2     |
| c. If the drug is continued or decreased 50% from peak > 30 days, or inconclusive                                                                                                                                                                                                            | 0      |
| d. Against causative role for drug                                                                                                                                                                                                                                                           | -2     |
| <b>3. Risk Factors</b>                                                                                                                                                                                                                                                                       |        |
| a. Alcohol use, 1; No alcohol use, 0                                                                                                                                                                                                                                                         | 0 or 1 |
| b. Age $\geq 55$ years, +1; Age $\leq 55$ years, 0                                                                                                                                                                                                                                           | 0 or 1 |
| <b>4. Concomitant drug</b>                                                                                                                                                                                                                                                                   |        |
| a. No concomitant drug administered                                                                                                                                                                                                                                                          | 0      |
| b. Concomitant drug with suggestive or compatible time of onset                                                                                                                                                                                                                              | -1     |
| c. Concomitant known hepatotoxin with suggestive or compatible time of onset                                                                                                                                                                                                                 | -2     |
| d. Concomitant drug with positive rechallenge or validated diagnostic test                                                                                                                                                                                                                   | -3     |
| <b>5. Nondrug causes: Six are primary: Recent hepatitis A, B, or C, biliary obstruction, acute alcoholic hepatitis (AST <math>\geq 2 \times</math> ALT), recent hypotension (especially if heart disease). Secondary group: Underlying other disease; possible CMV, EBV or HSV infection</b> |        |
| a. In this category, all primary and secondary causes reasonably ruled out                                                                                                                                                                                                                   | +2     |
| b. All 6 primary causes ruled out                                                                                                                                                                                                                                                            | +1     |
| c. 4 to 5 primary causes ruled out                                                                                                                                                                                                                                                           | 0      |
| d. Fewer than 4 primary causes ruled out (maximum negative score for items 4 and 5: -4)                                                                                                                                                                                                      | -2     |
| e. Non drug cause highly probable                                                                                                                                                                                                                                                            | -3     |
| <b>6. Previous information on hepatotoxicity of the drug in question</b>                                                                                                                                                                                                                     |        |
| a. Package insert or labeling mention                                                                                                                                                                                                                                                        | +2     |
| b. Published case reports but not in label                                                                                                                                                                                                                                                   | +1     |
| c. Reaction unknown                                                                                                                                                                                                                                                                          | 0      |
| <b>7. Rechallenge</b>                                                                                                                                                                                                                                                                        |        |
| a. Positive (ALT doubles with drug in question alone)                                                                                                                                                                                                                                        | +3     |
| b. Compatible (ALT doubles with same drugs as given before initial reaction)                                                                                                                                                                                                                 | +1     |
| c. Negative (Increase in ALT but $\leq 2 \times$ ULN, same conditions as when reaction occurred)                                                                                                                                                                                             | -2     |
| d. Not done, or indeterminate result                                                                                                                                                                                                                                                         | 0      |

Total (range of algebraic sum: - 8 to + 14)

Score Interpretation: Highly probable >8; Probable 6-8; Possible 3-5; Unlikely 1-2; Excluded < 0
